# Supplementary material for: High-throughput optimisation of light-driven microalgae biotechnologies
Source: PubMed Central journal article supplement (PMC6076246; doi:10.1038/s41598-018-29954-x), 2018-08-03
Supplement: 41598_2018_29954_MOESM1_ESM.pdf [file 41598_2018_29954_MOESM1_ESM.pdf]

## **Supplementary information for Manuscript**

**Title: High-throughput optimisation of light-driven microalgae biotechnologies**

Shwetha Sivakaminathan<sup>1</sup>, Ben Hankamer<sup>1</sup>, Juliane Wolf<sup>1\*</sup>, Jennifer Yarnold<sup>1\*</sup>

<sup>1</sup>The University of Queensland, Institute for Molecular Bioscience, 306 Carmody Road, St Lucia, Australia

### Contents

|                                                   |   |
|---------------------------------------------------|---|
| Supplementary Figure S1 for Section 3.2 (a) ..... | 1 |
| Supplementary Figure S2 for Section 3.2 (b) ..... | 2 |
| Supplementary Figure S3 for Section 3.2 (c).....  | 3 |
| Supplementary Table S1 for Section 3.2.....       | 4 |
| Supplementary Figure S4 for Section 3.2 (d) ..... | 5 |
| Supplementary Figure S5 for Section 3.3.1.....    | 6 |
| Supplementary Table S2 for Section 3.4.....       | 7 |
| Supplementary Table S3 for Section 5.1.....       | 8 |
| Supplementary Figure S6 for Section 5.2.....      | 9 |

Supplementary Figure S1 for Section 3.2 (a)

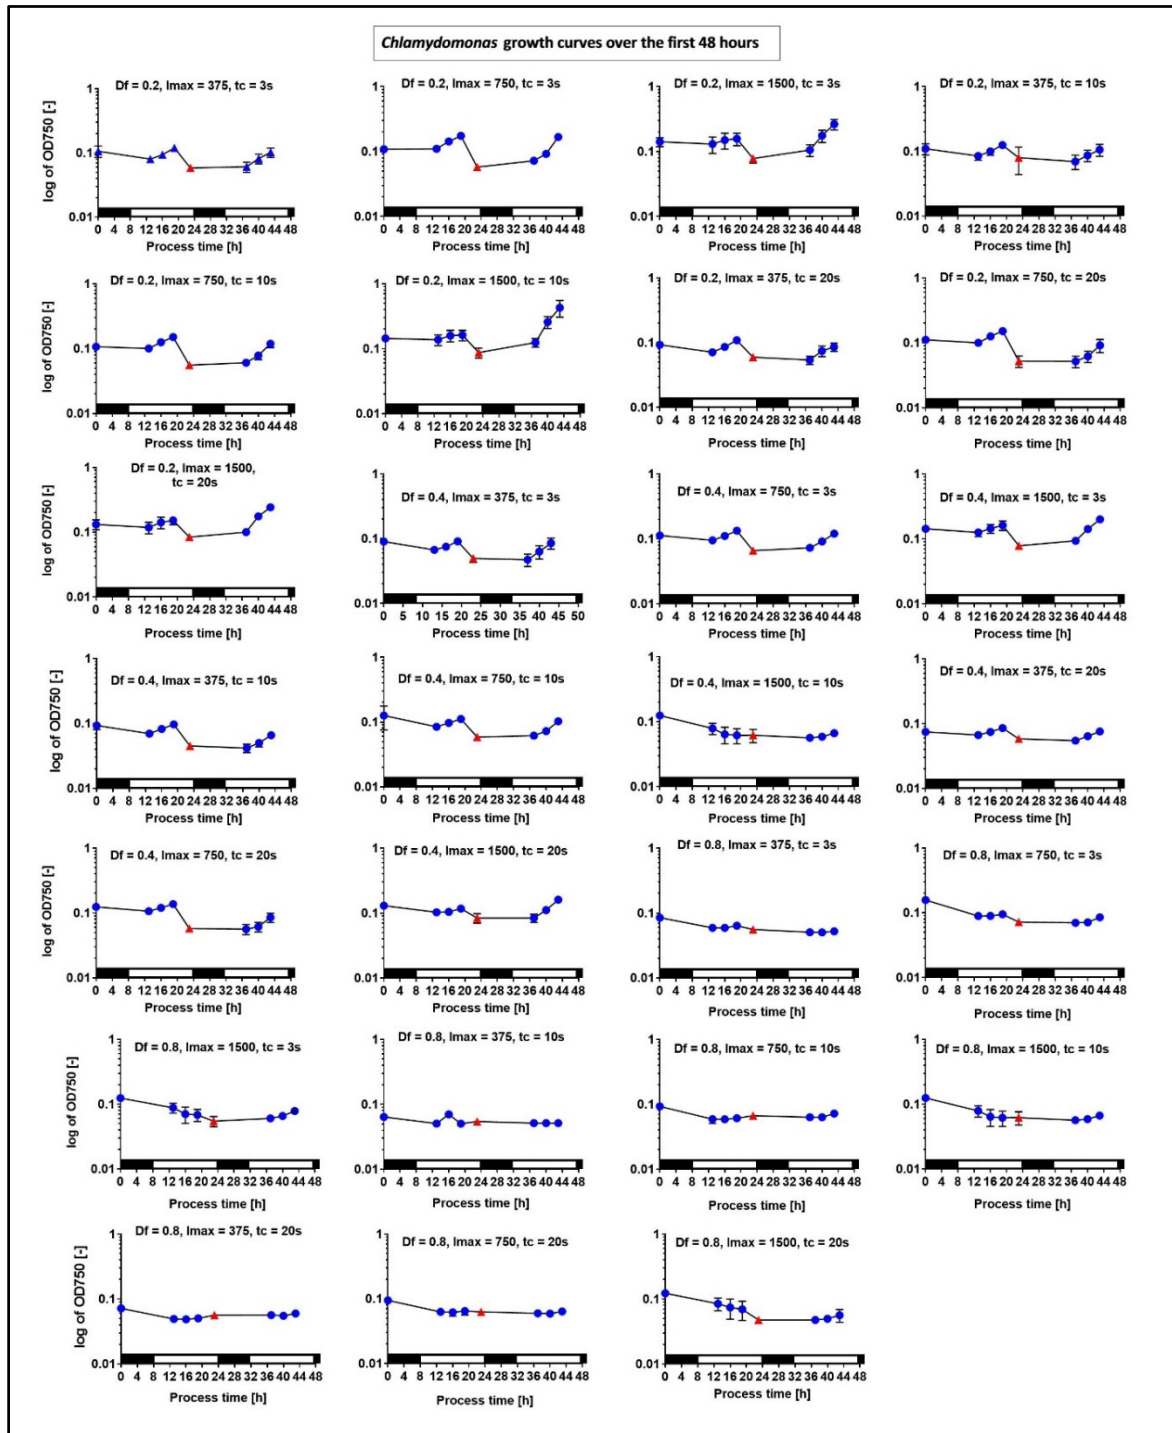

Supplementary Figure S1. Growth curves of *Chlamydomonas* over the first 48 hours for the 27 conditions tested. Red triangles represent the OD measurement after dilution. Bottom bars represent the duration of the 16/8 h light/dark cycles: black = dark period and white = light period with the respective fluctuating light regime. The points above the first white bar represent Day 1 (acclimation phase) and the points after the red triangle represent Day 2 (quasi-steady state) data used for growth rate and  $PE_{\mu}$  calculations. All data are mean of 3 replicates  $\pm$  standard deviation.

Supplementary Figure S2 for Section 3.2 (b)

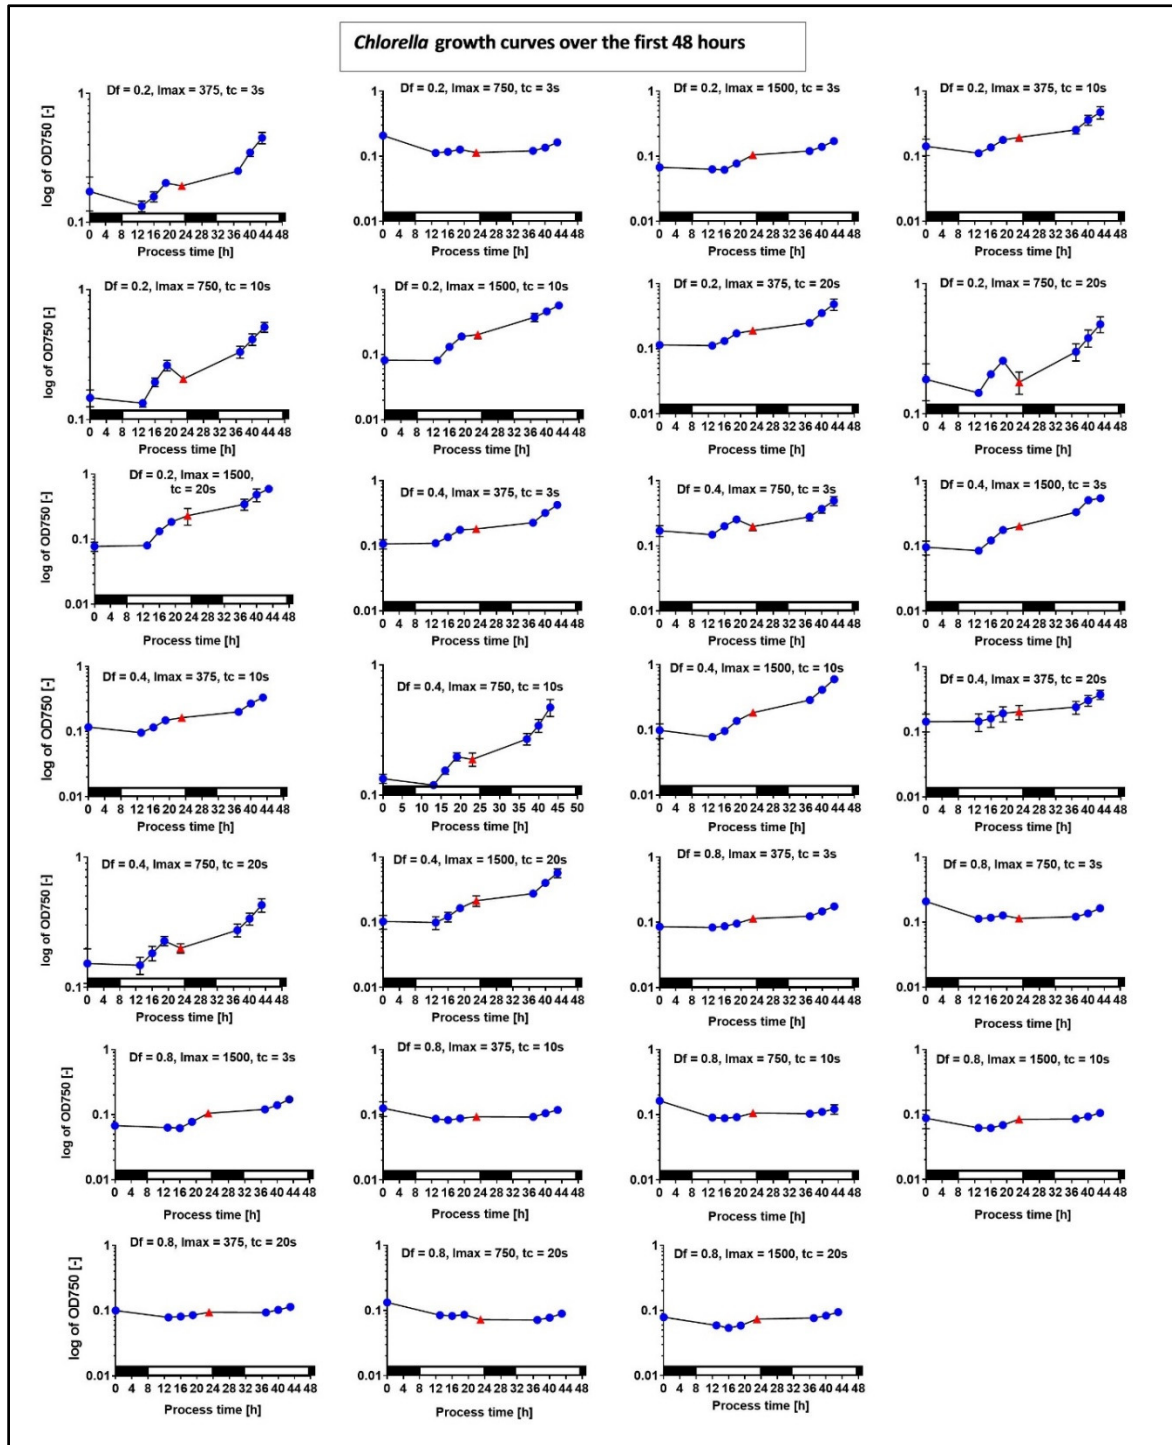

Supplementary Figure S2. Growth curves of *Chlorella* over the first 48 hours for the 27 conditions tested. Red triangles represent the OD measurement after dilution. Bottom bars represent the duration of the 16/8 h light/dark cycles: black = dark period and white = light period with the respective fluctuating light regime. The points above the first white bar represent Day 1 (acclimation phase) and the points after the red triangle represent Day 2 (quasi-steady state) data used for growth rate and  $PE_{\mu}$  calculations. All data are mean of 3 replicates  $\pm$  standard deviation.

Supplementary Figure S3 for Section 3.2 (c)

Supplementary Figure S3. Trends in photosynthetic efficiency ( $PE_{\mu}$ , mol photon<sup>-1</sup> m<sup>2</sup>) under the 27 different light regimes for *Chlamydomonas* (grey bars) and *Chlorella* (blue bars) during the acclimation phase (Day1, A and B).

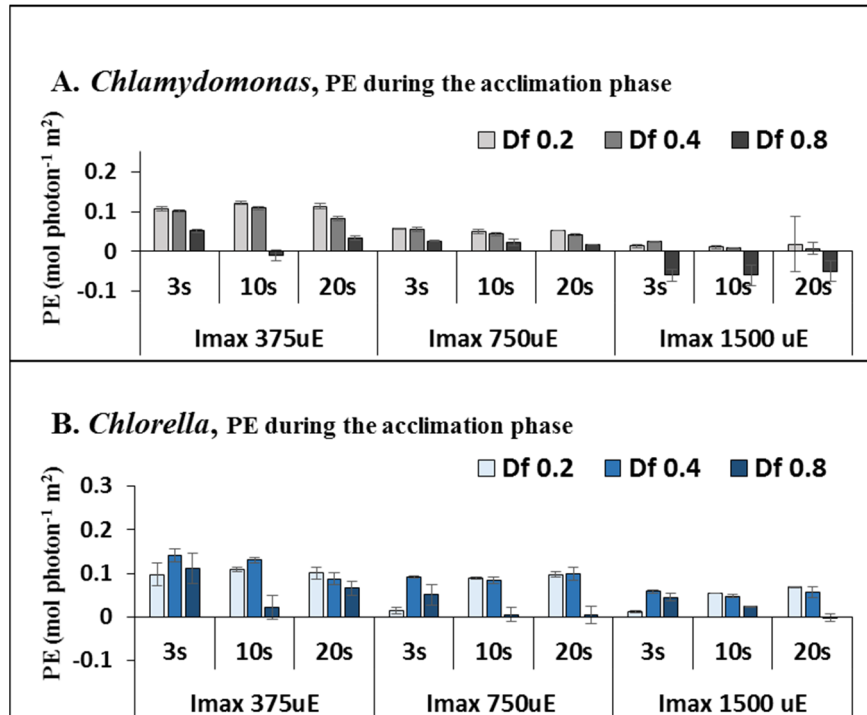

Supplementary Table S1 for Section 3.2

Supplementary Table S1.  $PE_{\mu}$  of *Chlamydomonas* and *Chlorella* under constant light of the same average irradiance as fluctuating light treatments of each unique combination of  $I_{\max}$  and  $D_f$  (as per Table 1 in the main text). All data represent the mean of 3 replicates  $\pm$  standard deviation

| $I_{\text{avg}}$                       | $PE_{\mu}$ under <u>constant light</u> (mol photon <sup>-1</sup> m <sup>2</sup> ) |                   |
|----------------------------------------|-----------------------------------------------------------------------------------|-------------------|
| (mol m <sup>-2</sup> h <sup>-1</sup> ) | <i>Chlamydomonas</i>                                                              | <i>Chlorella</i>  |
| 0.619                                  | 0.149 $\pm$ 0.004                                                                 | 0.120 $\pm$ 0.019 |
| 0.490                                  | 0.169 $\pm$ 0.008                                                                 | 0.151 $\pm$ 0.006 |
| 0.367                                  | 0.175 $\pm$ 0.008                                                                 | 0.178 $\pm$ 0.010 |
| 0.180                                  | 0.178 $\pm$ 0.040                                                                 | 0.253 $\pm$ 0.026 |
| 1.242                                  | 0.054 $\pm$ 0.004                                                                 | 0.103 $\pm$ 0.003 |
| 0.979                                  | 0.113 $\pm$ 0.000                                                                 | 0.058 $\pm$ 0.007 |
| 0.738                                  | 0.116 $\pm$ 0.013                                                                 | 0.078 $\pm$ 0.002 |
| 0.360                                  | 0.197 $\pm$ 0.006                                                                 | 0.050 $\pm$ 0.002 |
| 2.480                                  | 0.045 $\pm$ 0.010                                                                 | 0.011 $\pm$ 0.000 |
| 1.958                                  | 0.061 $\pm$ 0.004                                                                 | 0.029 $\pm$ 0.001 |
| 1.472                                  | 0.055 $\pm$ 0.004                                                                 | 0.051 $\pm$ 0.001 |
| 0.713                                  | 0.111 $\pm$ 0.010                                                                 | 0.049 $\pm$ 0.005 |

Supplementary Figure S4 for Section 3.2 (d)

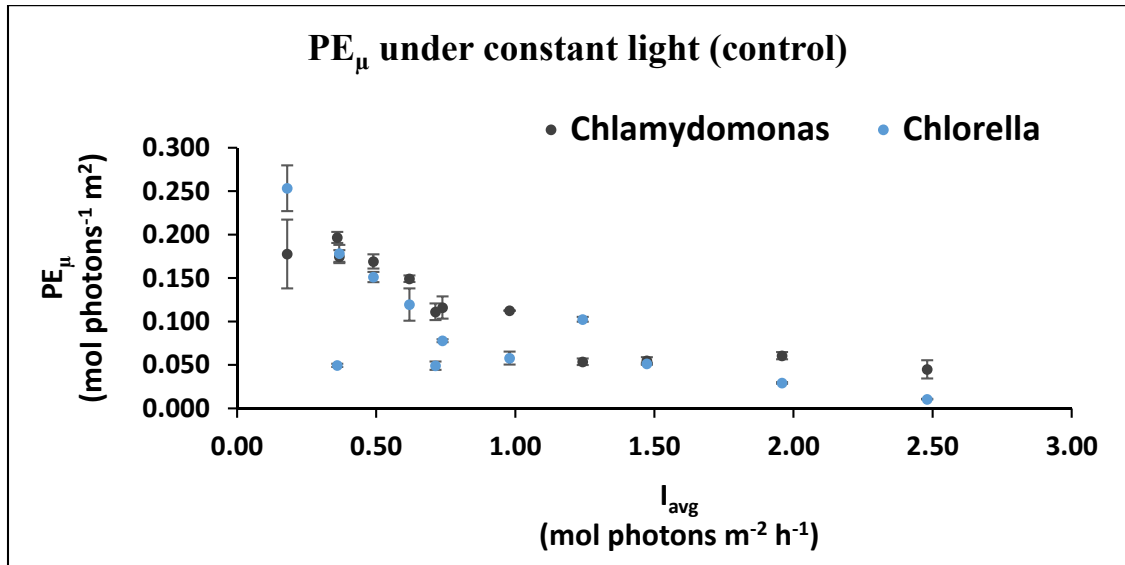

Supplementary Figure S4. Trends in photosynthetic efficiency (PE<sub>μ</sub>, mol photon<sup>-1</sup> m<sup>2</sup>) under constant light for *Chlamydomonas* and *Chlorella* of the same I<sub>avg</sub> as fluctuating light regimes of each unique combinations of I<sub>max</sub> and D<sub>f</sub> on Day 2. Error bars represent standard deviations (n=3).

Supplementary Figure S5 for Section 3.3.1

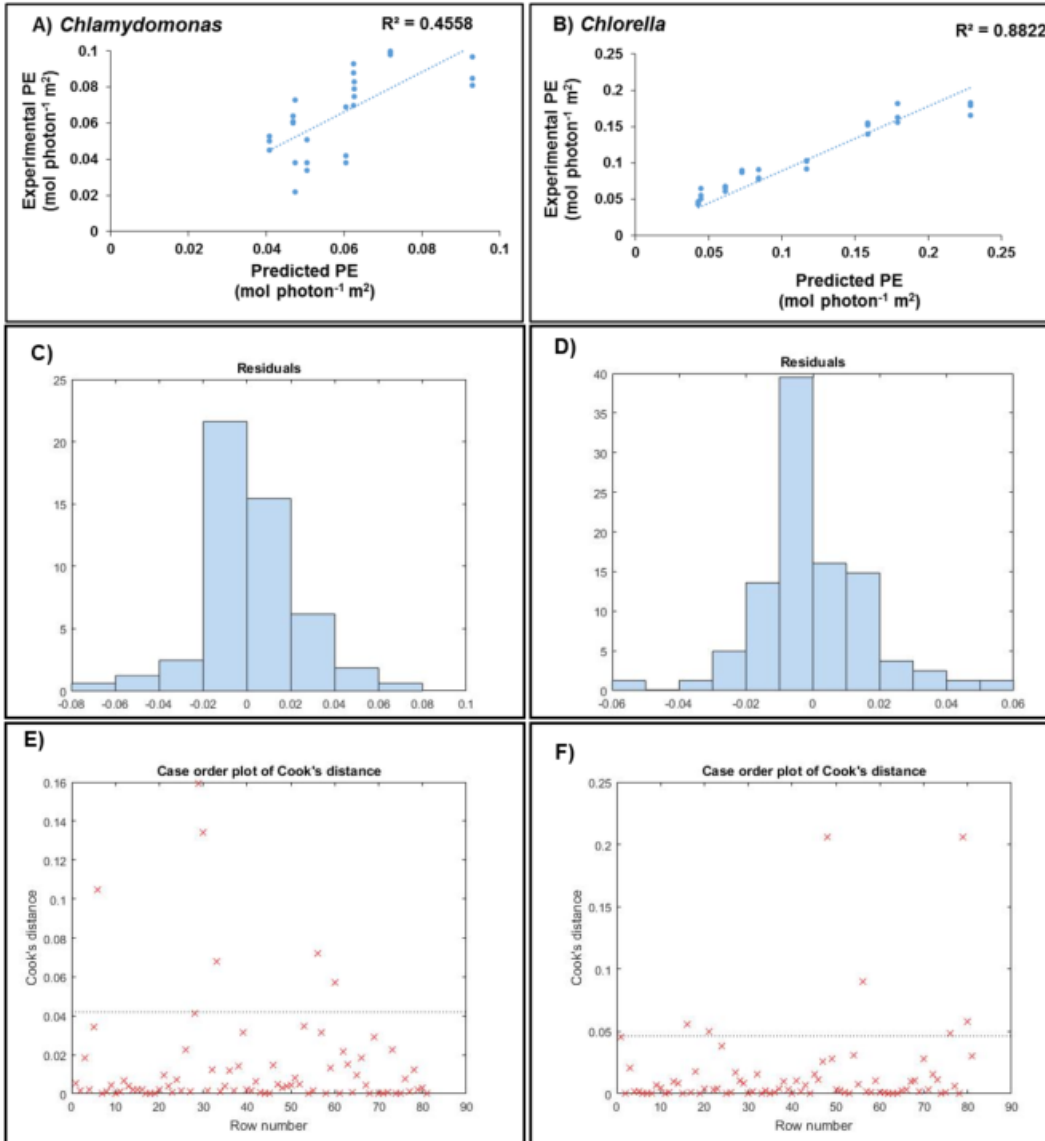

Supplementary Figure S5. Model validation using an independent data set. **A** and **B** display predicted versus experimental PE<sub>μ</sub> data (to confirm sufficient goodness of fit), **C** and **D** display residuals plot (to confirm normal distribution) and **E** and **F** Cook's distance plot (to identify outliers) for *Chlamydomonas* and *Chlorella* respectively.

Supplementary Table S2 for Section 3.4

Supplementary Table S2. Factor coefficients obtained from analysis of variance (ANOVA) for NPQ and OD<sub>680</sub>/OD<sub>750</sub>. All data represent the mean of 3 replicates ± standard deviation.

\* represents significant effects at p-value<0.05

|                                        | Coefficients from the quadratic non-linear model |                  |                                      |                  |
|----------------------------------------|--------------------------------------------------|------------------|--------------------------------------|------------------|
|                                        | NPQ                                              |                  | OD <sub>680</sub> /OD <sub>750</sub> |                  |
|                                        | <i>Chlamydomonas</i>                             | <i>Chlorella</i> | <i>Chlamydomonas</i>                 | <i>Chlorella</i> |
| <b>D<sub>f</sub></b>                   | -0.0026                                          | -0.0155*         | 0.2514*                              | 0.1879*          |
| <b>I<sub>max</sub></b>                 | 0.0267*                                          | -0.0134*         | -0.2208*                             | 0.0300*          |
| <b>t<sub>c</sub></b>                   | 0.0061                                           | -0.0046          | 0.0106                               | -0.0674*         |
| <b>D<sub>f</sub> - I<sub>max</sub></b> | 0.0006                                           | -0.0098          | 0.0408*                              | 0.02153          |
| <b>D<sub>f</sub> - t<sub>c</sub></b>   | 0.0056                                           | -0.0008          | -0.0162                              | 0.0705*          |
| <b>I<sub>max</sub> - t<sub>c</sub></b> | 0.0058                                           | 0.0003           | 0.0163                               | -0.0471*         |
| <b>D<sub>f</sub><sup>2</sup></b>       | -0.0313*                                         | -0.0026          | 0.1206*                              | 0.3359*          |
| <b>I<sub>max</sub><sup>2</sup></b>     | 0.0141                                           | -0.0101          | 0.0619*                              | -0.0143          |
| <b>t<sub>c</sub><sup>2</sup></b>       | 0.0081                                           | -0.0056          | 0.0078                               | -0.0093          |
| <b>Intercept</b>                       | 0.1729                                           | 0.0933           | 2.0436                               | 1.734            |
| <b>R<sup>2</sup></b>                   | 0.49                                             | 0.37             | 0.89                                 | 0.85             |



Supplementary Table S3 for Section 5.1

Supplementary Table S3. Cell synchronisation procedure. The acclimation procedure for the light regime experiments based on the  $I_{\max}$  considered. “Ticks” or “x” represent that particular step was or was not performed for the corresponding  $I_{\max}$  experiment respectively. Note: For the higher intensity ( $I_{\max}$  1500), care was taken not to shock the cultures by subjecting them to a step-wise gradually increasing light regime.

| Duration                                       | Samples                                                                                  | Light regime                                                                          | $I_{\max}$<br>375 | $I_{\max}$<br>750 | $I_{\max}$<br>1500 |
|------------------------------------------------|------------------------------------------------------------------------------------------|---------------------------------------------------------------------------------------|-------------------|-------------------|--------------------|
| ~ 2-3 days                                     | <b>Pre flasks</b> on shakers outside the TECAN                                           | Constant overhead light ~100 $\mu$ E                                                  | ☑                 | ☑                 | ☑                  |
| ~ 2-4 days                                     | <b>Pre-flasks</b> in TECAN with overhead lights                                          | Constant ~100 $\mu$ E<br>L/D 16/8 h                                                   | ☑                 | ☒                 | ☒                  |
| ~ 2 days                                       | <b>Pre-flasks</b> in TECAN with LED's                                                    | TECAN LED's 100 $\mu$ E constant light;<br>L/D 16/8 h                                 | ☑                 | ☒                 | ☒                  |
| ~ 24 hours                                     | <b>Pre-flasks</b> in TECAN with LEDs                                                     | Constant 350 $\mu$ E LEDs , L/D 16/8 h                                                | ☒                 | ☒                 | ☑                  |
| Pre flasks, 2 hours                            | <b>Pre-flasks</b> in TECAN                                                               | 400 $\mu$ E (1 h), 600 $\mu$ E (1 h)                                                  | ☒                 | ☒                 | ☑                  |
| 1hour                                          | Cultures adjusted to target starting OD <sub>750</sub> ; Plated in <b>96 well plates</b> | TECAN LED's at 100 $\mu$ E constant light;<br>L/D 16/8 h                              | ☑                 | ☑                 | ☒                  |
| Start of experiment                            | 96-well plates-light regime is set.                                                      | Considered ready for measurements as mentioned in the Methods section.<br>L/D 16/8 h  | ☑                 | ☑                 | ☒                  |
| Day 0, after plating                           | 96 well plates- gradual light acclimation in progress for higher $I_{\max}$ experiment.  | 1 h 200 $\mu$ E constant                                                              | ☒                 | ☒                 | ☑                  |
|                                                |                                                                                          | 2 h light cycles with $I_{\max}$ = 750 $\mu$ E                                        |                   |                   |                    |
|                                                |                                                                                          | First measurement as mentioned in the Methods section                                 |                   |                   |                    |
|                                                |                                                                                          | 8h dark period                                                                        |                   |                   |                    |
| Day 1, AM, gradual acclimation                 | Acclimation of plates continue-before making the first dilution                          | First 4 h of light after dark period: Light regime with $I_{\max}$ = 750 $\mu$ E      | ☒                 | ☒                 | ☑                  |
|                                                |                                                                                          | Next 6h – light regime with $I_{\max}$ = 1500 $\mu$ E followed by dilution of samples |                   |                   |                    |
| Day 1, afternoon                               | Acclimation of plates continue-Post-dilution of plates.                                  | 2.5 h light regimes with $I_{\max}$ = 750 $\mu$ E (for recovery after dilution)       | ☒                 | ☒                 | ☑                  |
|                                                | Acclimation set.                                                                         | 2 h light regime with $I_{\max}$ = 1000 $\mu$ E                                       |                   |                   |                    |
|                                                |                                                                                          | 1.5 h light regime with $I_{\max}$ = 1500 $\mu$ E                                     |                   |                   |                    |
|                                                |                                                                                          | 8 h dark period                                                                       |                   |                   |                    |
| Day 2, AM                                      | Acclimation continues                                                                    | 10 h light regime with $I_{\max}$ = 1500 $\mu$ E followed by dilution of cultures.    | ☒                 | ☒                 | ☑                  |
| Day 2, afternoon onwards up to Day 3 afternoon | Acclimation continues                                                                    | Repeat same as Day 1 afternoon onwards                                                | ☒                 | ☒                 | ☑                  |

## Supplementary Figure S6 for Section 5.2

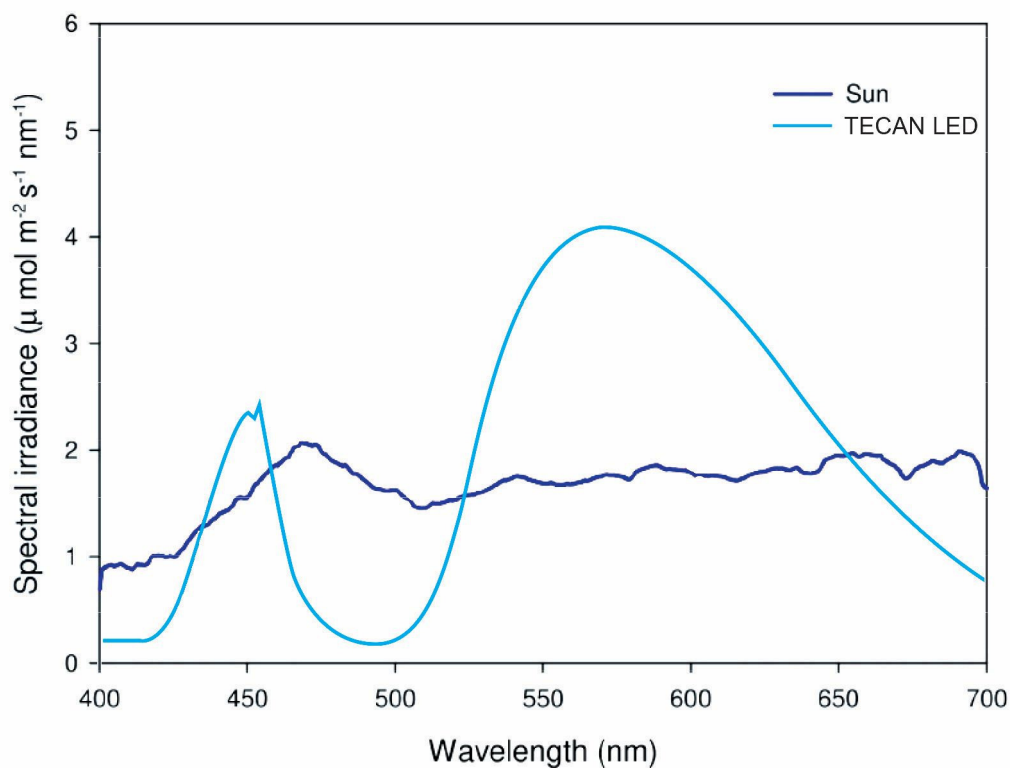

**Supplementary Figure S6.** Approximation of the spectral irradiance over the PAR spectrum (400-700nm) showing the difference between sunlight (dark blue line) and the warm white LEDs of the TECAN system (light blue line). Sun spectrum reproduced from Yarnold, J.<sup>1</sup>. TECAN spectrum reproduced from World of Thought Pty Ltd, Australia ([www.worldofthought.com.au](http://www.worldofthought.com.au)).

### Reference

- 1 Yarnold, J. *Photosynthesis of microalgae in outdoor mass cultures and modelling its effects on biomass productivity for fuels, feeds and chemicals* PhD thesis, The University of Queensland, (2016).
